# Supplementary material for: Functional Characterization of Melanocortin-3 Receptor in a Hibernating Cavefish Onychostoma macrolepis
Source: MDPI journal article supplement (doi:10.3390/ani12010038), 2021-12-25
Supplement: s1 [file s1]

Table S1. GenBank accession numbers of amino acid sequences used in multiple sequence alignment and phylogenetic analysis.

| Species                         | Member of MCRs | GenBank accession number |
|---------------------------------|----------------|--------------------------|
| <i>Danio rerio</i>              | Mc1r           | AAI62836.1               |
|                                 | Mc2r           | AAO24743.1               |
|                                 | Mc3r           | AAI62747.1               |
|                                 | Mc4r           | AAL85494.1               |
|                                 | Mc5ra          | AAI62797.1               |
|                                 | Mc5rb          | AAI63224.1               |
| <i>Carassius auratus</i>        | Mc1r           | BAJ83471.1               |
|                                 | Mc2r           | BAJ83472.1               |
|                                 | Mc3r           | BAJ83473.1               |
|                                 | Mc4r           | XP_026063043.1           |
| <i>Cyprinus carpio</i>          | Mc1r           | AGC50885.1               |
|                                 | Mc2r           | CAE53845.1               |
|                                 | Mc3r           | XP_018922723.1           |
| <i>Xenopus tropicalis</i>       | Mc3r           | XP_002935436.1           |
|                                 | Mc5r           | AAI35996.1               |
| <i>Rana temporaria</i>          | Mc3r           | XP_040186095.1           |
|                                 | Mc5r           | XP_040209847.1           |
| <i>Chelonia mydas</i>           | MC3R           | XP_007059824.1           |
| <i>Mus musculus</i>             | MC3R           | NP_032587.1              |
| <i>Alligator sinensis</i>       | MC3R           | XP_006018246.1           |
| <i>Cyanistes caeruleus</i>      | MC3R           | XP_023795718.1           |
| <i>Gallus gallus</i>            | MC3R           | BAA32555.1               |
| <i>Taricha granulosa</i>        | Mc3r           | AAX18229.1               |
| <i>Pongo abelii</i>             | MC3R           | PNJ37794.1               |
| <i>Cricetulus griseus</i>       | MC3R           | XP_003501490.1           |
| <i>Mus Pahari</i>               | MC3R           | XP_021049931.1           |
| <i>Sus scrofa</i>               | MC3R           | NP_001116609.1           |
| <i>Homo sapiens</i>             | MC3R           | AAH69105.1               |
| <i>Cyprinodon variegatus</i>    | Mc4r           | XP_015237674.1           |
| <i>Bufo bufo</i>                | Mc5r           | XP_040288553.1           |
| <i>Oncorhynchus tshawytscha</i> | Mc3r           | XP_024229914.1           |
| <i>Onychostoma macrolepis</i>   | Mc3r           | MW884251                 |
